# Supplementary material for: Catalytic decarbonylation of stearic acid to hydrocarbons over activated carbon-supported nickel
Source: Royal Society of Chemistry journal article supplement (doi:10.1039/c8se00189h), 2018-01-01
Supplement: c8se00189h1.pdf [file c8se00189h1.pdf]

## **Catalytic Decarbonylation of Stearic Acid to Hydrocarbons over Activated Carbon-supported Nickel**

Zihao Zhang<sup>a</sup>, Zhe Chen<sup>a</sup>, Hao Chen<sup>a</sup>, Xin Gou<sup>a</sup>, Kequan Chen<sup>b</sup>, Xiuyang Lu<sup>a</sup>,  
Pingkai Ouyang<sup>a,b</sup>, Jie Fu<sup>a\*</sup>

<sup>a</sup> Key Laboratory of Biomass Chemical Engineering of Ministry of Education,  
College of Chemical and Biological Engineering, Zhejiang University, Hangzhou  
310027, China

<sup>b</sup> State Key Laboratory of Materials-Oriented Chemical Engineering, College of  
Biotechnology and Pharmaceutical Engineering, Nanjing Tech University, Nanjing  
211816, China

The band located around  $3425\text{ cm}^{-1}$  corresponds to  $\nu(\text{O-H})$  vibrations in hydroxyl group. The  $\nu(\text{O-H})$  vibrations in esters, ether or phenol groups cause the bands between  $900\text{-}1300\text{ cm}^{-1}$ . The bands located around  $663$  and  $1569\text{ cm}^{-1}$  ascribes to  $\gamma(\text{O-H})$  vibration and  $\nu(\text{C=C})$  vibration in aromatics group respectively.<sup>1</sup> Therefore, the main surface functional groups associated with Ni/AC were hydroxyl, esters, aromatics groups.

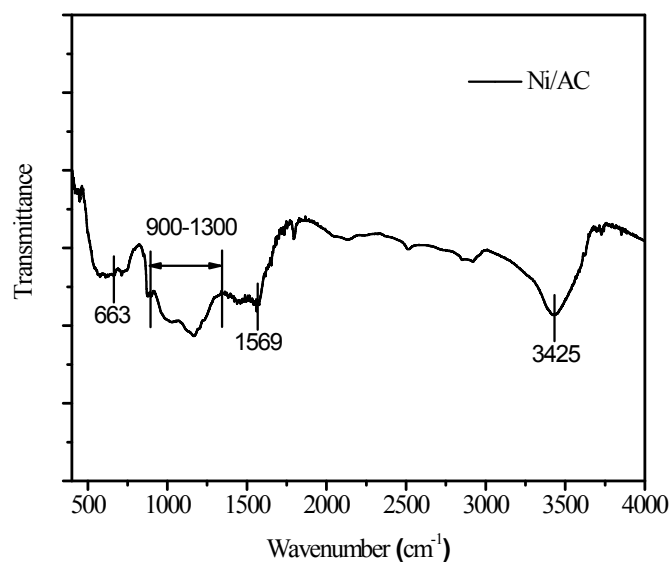

Figure S1. Fourier transform infrared spectra of Ni/AC

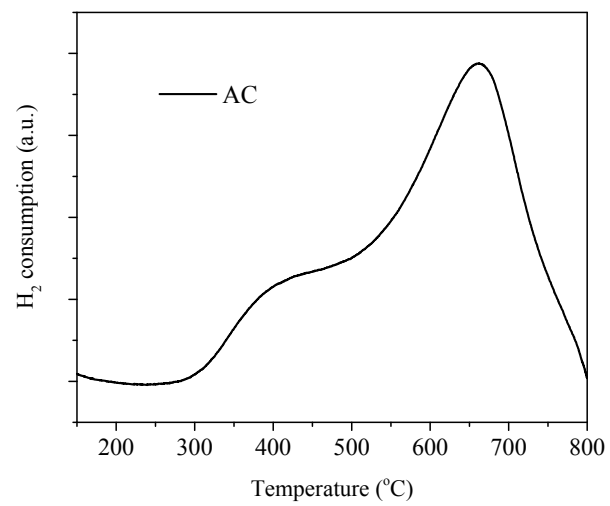

Figure S2. H<sub>2</sub>-TPR result of AC

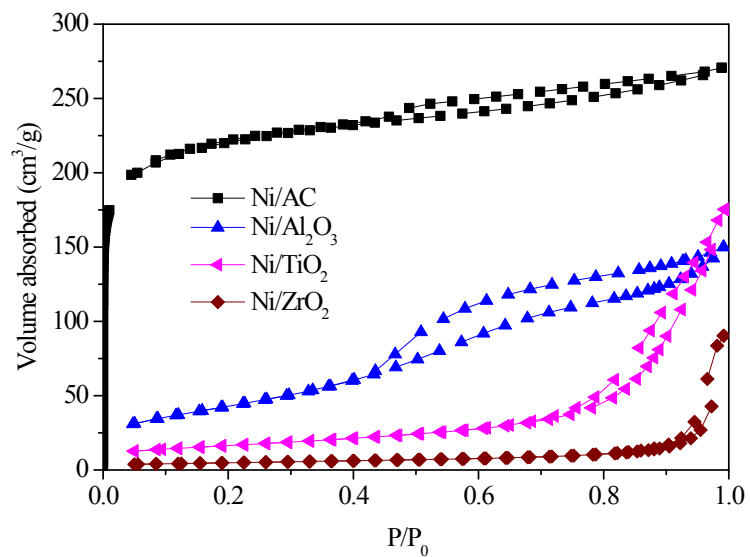

Figure S3. N<sub>2</sub> adsorption-desorption isotherms of four Ni-based catalysts

1. A. C. Lua and T. Yang, *J. colloid interf. sci.*, 2004, **274**, 594-601.
